# Supplementary material
Source: MDPI journal article supplement (https://www.mdpi.com/2311-7524/9/1/118)
Supplement: s1 [file s1]

**Table S1** Effects of chlorophyll a (Chla) and chlorophyll b (Chlb) in *C. tientaiensis* subjected to different irradiance levels, including T1( $1800 \pm 30/0 \mu \text{mol m}^{-2} \text{s}^{-1}$ ), T2( $1500 \pm 30/0 \mu \text{mol m}^{-2} \text{s}^{-1}$ ), T3 ( $1200 \pm 30/0 \mu \text{mol m}^{-2} \text{s}^{-1}$ ) and T4 ( $900 \pm 30/0 \mu \text{mol m}^{-2} \text{s}^{-1}$ ). The values presented are the means  $\pm$  SE (n = 10 plants). Different lowercase letters indicate significant differences based on one way ANOVA followed by Duncan' s multiple comparisons ( $P \leq 0.05$ ).

| Irradiance | Chlorophyll content ( $\text{mg g}^{-1}$ ) |                         |
|------------|--------------------------------------------|-------------------------|
|            | Chlorophyll a                              | Chlorophyll b           |
| T1         | $0.97 \pm 0.09\text{d}$                    | $0.37 \pm 0.02\text{d}$ |
| T2         | $1.31 \pm 0.06\text{c}$                    | $0.65 \pm 0.03\text{c}$ |
| T3         | $1.48 \pm 0.06\text{b}$                    | $0.87 \pm 0.04\text{b}$ |
| T4         | $1.65 \pm 0.07\text{a}$                    | $1.03 \pm 0.05\text{a}$ |

**Table S2** Photosynthetic parameters of *C. tientaiensis* subjected to four different irradiance levels, including T1 ( $1800 \pm 30/0 \mu \text{mol m}^{-2} \text{s}^{-1}$ ), T2 ( $1500 \pm 30/0 \mu \text{mol m}^{-2} \text{s}^{-1}$ ), T3 ( $1200 \pm 30/0 \mu \text{mol m}^{-2} \text{s}^{-1}$ ) and T4 ( $900 \pm 30/0 \mu \text{mol m}^{-2} \text{s}^{-1}$ ). The values presented are the means  $\pm$  SE (n = 10 plants). The values presented are the means  $\pm$  SE (n = 10 plants). Different lowercase letters indicate significant differences based on one-way ANOVA followed by Duncan' s multiple comparisons ( $P \leq 0.05$ ).

| Irradiance | Photosynthetic parameters                       |                                     |                                                              |                                              |
|------------|-------------------------------------------------|-------------------------------------|--------------------------------------------------------------|----------------------------------------------|
|            | Pn<br>( $\mu \text{mol m}^{-2} \text{s}^{-1}$ ) | Gs<br>( $\mu \text{mol mol}^{-1}$ ) | Ci<br>( $\mu \text{mol}/(\text{H}_2\text{O m}^2 \text{s})$ ) | Tr<br>( $\text{mmol m}^{-2} \text{s}^{-1}$ ) |
| T1         | $5.42 \pm 0.21\text{c}$                         | $0.13 \pm 0.01\text{d}$             | $289.40 \pm 7.62\text{a}$                                    | $1.13 \pm 0.08\text{d}$                      |
| T2         | $6.57 \pm 0.23\text{b}$                         | $0.19 \pm 0.02\text{c}$             | $252.55 \pm 4.27\text{b}$                                    | $1.57 \pm 0.05\text{c}$                      |
| T3         | $7.55 \pm 0.28\text{a}$                         | $0.29 \pm 0.02\text{a}$             | $277.40 \pm 9.29\text{a}$                                    | $2.09 \pm 0.07\text{a}$                      |
| T4         | $6.66 \pm 0.27\text{c}$                         | $0.23 \pm 0.02\text{b}$             | $232.74 \pm 3.94\text{c}$                                    | $1.80 \pm 0.07\text{b}$                      |

**Table S3** The Rubisco activase enzyme (RAC) and Rubisco enzyme activity of *C. tientaiensis* subjected to different levels, irradiance including T1 ( $1800 \pm 30/0 \mu \text{mol m}^{-2} \text{s}^{-1}$ ), T2 ( $1500 \pm 30/0 \mu \text{mol m}^{-2} \text{s}^{-1}$ ), T3 ( $1200 \pm 30/0 \mu \text{mol m}^{-2} \text{s}^{-1}$ ) and T4 ( $900 \pm 30/0 \mu \text{mol m}^{-2} \text{s}^{-1}$ ). The values presented are the means  $\pm$  SE (n = 10 plants). Different lowercase letters indicate significant differences based on one-way ANOVA followed by Duncan' s multiple comparisons ( $P \leq 0.05$ ).

| Irradiance | Rubisco activase enzyme<br>( $\text{mmol g}^{-1} \text{min}^{-1} \text{FW}$ ) | Rubisco activity<br>( $\text{mmol g}^{-1} \text{min}^{-1} \text{FW}$ ) |
|------------|-------------------------------------------------------------------------------|------------------------------------------------------------------------|
|            |                                                                               |                                                                        |
| T1         | $1.07 \pm 0.05\text{c}$                                                       | $140.36 \pm 3.67\text{c}$                                              |
| T2         | $1.37 \pm 0.04\text{b}$                                                       | $158.27 \pm 4.05\text{b}$                                              |
| T3         | $1.79 \pm 0.05\text{a}$                                                       | $187.36 \pm 4.34\text{a}$                                              |
| T4         | $1.35 \pm 0.05\text{b}$                                                       | $159.12 \pm 2.93\text{b}$                                              |

**Table S4** The  $O_2^{\cdot -}$  production rate and  $H_2O_2$  content of *C. tientaiensis* subjected to different irradiance levels, including T1 ( $1800 \pm 30/0 \mu mol m^{-2} s^{-1}$ ), T2 ( $1500 \pm 30/0 \mu mol m^{-2} s^{-1}$ ), T3 ( $1200 \pm 30/0 \mu mol m^{-2} s^{-1}$ ) and T4 ( $900 \pm 30/0 \mu mol m^{-2} s^{-1}$ ). The values presented are the means  $\pm$  SE (n = 10 plants). Different lowercase letters indicate significant differences based on one-way ANOVA followed by Duncan's multiple comparisons ( $P \leq 0.05$ ).

| <b>Irradiance</b> | <b><math>O_2^{\cdot -}</math> production rate<br/>(mmol min<sup>-1</sup> g<sup>-1</sup> FW)</b> | <b><math>H_2O_2</math> content<br/>(mmol g<sup>-1</sup> FW)</b> |
|-------------------|-------------------------------------------------------------------------------------------------|-----------------------------------------------------------------|
| T1                | 35.61 $\pm$ 0.98a                                                                               | 1.34 $\pm$ 0.13a                                                |
| T2                | 26.96 $\pm$ 1.77b                                                                               | 0.78 $\pm$ 0.04b                                                |
| T3                | 17.99 $\pm$ 1.86d                                                                               | 0.29 $\pm$ 0.02c                                                |
| T4                | 21.84 $\pm$ 1.28c                                                                               | 0.86 $\pm$ 0.11b                                                |

**Table S5** Effects of different irradiance levels on gene expression in *C. tientaiensis* leaves. Irradiance levels including T1 ( $1800 \pm 30/0 \mu mol m^{-2} s^{-1}$ ), T2 ( $1500 \pm 30/0 \mu mol m^{-2} s^{-1}$ ), T3 ( $1200 \pm 30/0 \mu mol m^{-2} s^{-1}$ ) and T4 ( $900 \pm 30/0 \mu mol m^{-2} s^{-1}$ ). Bars indicate SE (n=3).

| <b>Irradiance</b> | <b>Related gene expression of chloroplast</b> |                            |                            |                                |
|-------------------|-----------------------------------------------|----------------------------|----------------------------|--------------------------------|
|                   | <i>psbA</i> (Fold change )                    | <i>psbb</i> (Fold change ) | <i>psbc</i> (Fold change ) | <i>Psb(OCE)</i> (Fold change ) |
| T1                | 1.00 $\pm$ 0.03                               | 1.00 $\pm$ 0.03            | 1.00 $\pm$ 0.02            | 1.00 $\pm$ 0.02                |
| T2                | 0.56 $\pm$ 0.05                               | 0.75 $\pm$ 0.08            | 0.87 $\pm$ 0.03            | 0.83 $\pm$ 0.04                |
| T3                | 0.43 $\pm$ 0.05                               | 0.51 $\pm$ 0.06            | 0.65 $\pm$ 0.03            | 0.72 $\pm$ 0.03                |
| T4                | 0.22 $\pm$ 0.08                               | 0.33 $\pm$ 0.07            | 0.51 $\pm$ 0.02            | 0.61 $\pm$ 0.03                |
